# Supplementary material for: Combination Effect of Microcystins and Arsenic Exposures on CKD: A Case-Control Study in China
Source: MDPI journal article supplement (doi:10.3390/toxins15020144), 2023-02-10
Supplement: s1 [file s1]

## Article

# Combination Effect of Microcystins and Arsenic Exposures on CKD: A Case-Control Study in China

Hong Gao, Na Zhu, Shuxiang Deng, Can Du, Yan Tang, Peng Tang, Shuaishuai Xu, Wenya Liu, Minxue Shen, Xinhua Xiao and Fei Yang

**Table S1.** Distribution of serum MCs concentration and plasma As concentration according to the case and control groups.

| Exposure   | Group   | Number | Mean | Percentile |      |      |      |      | <i>p</i> <sup>†</sup> |
|------------|---------|--------|------|------------|------|------|------|------|-----------------------|
|            |         |        |      | 5th        | 25th | 50th | 75th | 95th |                       |
| MCs (µg/L) | Total   | 270    | 0.17 | 0.05       | 0.12 | 0.16 | 0.21 | 0.32 | <0.001                |
|            | Case    | 135    | 0.19 | 0.05       | 0.13 | 0.16 | 0.23 | 0.35 |                       |
|            | Control | 135    | 0.15 | 0.50       | 0.10 | 0.14 | 0.19 | 0.29 |                       |
| As (µg/L)  | Total   | 270    | 1.51 | 0.50       | 0.80 | 1.12 | 1.41 | 3.40 | 0.003                 |
|            | Case    | 135    | 1.44 | 0.51       | 0.88 | 1.15 | 1.58 | 3.55 |                       |
|            | Control | 135    | 1.58 | 0.49       | 0.75 | 1.00 | 1.31 | 1.92 |                       |

<sup>†</sup> From Mann-Whitney U test.

**Table S2.** Distribution of serum MCs concentration and plasma As concentration according to the different eGFR groups.

| Exposure   | eGFR Groups <sup>*</sup> | Number | Mean | Percentile |      |      |      |      | <i>p</i> <sup>†</sup> |
|------------|--------------------------|--------|------|------------|------|------|------|------|-----------------------|
|            |                          |        |      | 5th        | 25th | 50th | 75th | 95th |                       |
| MCs (µg/L) | 1                        | 7      | 0.22 | 0.11       | 0.14 | 0.20 | 0.28 | -    | <0.001                |
|            | 2                        | 78     | 0.21 | 0.11       | 0.14 | 0.17 | 0.25 | 0.49 |                       |
|            | 3                        | 118    | 0.14 | 0.05       | 0.11 | 0.14 | 0.17 | 0.28 |                       |
|            | 4                        | 67     | 0.17 | 0.05       | 0.11 | 0.17 | 0.21 | 0.33 |                       |
| As (µg/L)  | 1                        | 7      | 2.59 | 0.95       | 1.23 | 2.36 | 3.80 | -    | <0.001                |
|            | 2                        | 78     | 1.59 | 0.61       | 1.03 | 1.28 | 1.72 | 4.72 |                       |
|            | 3                        | 118    | 1.64 | 0.53       | 0.76 | 1.02 | 1.27 | 1.87 |                       |
|            | 4                        | 67     | 1.09 | 0.39       | 0.69 | 0.93 | 1.28 | 2.88 |                       |

<sup>\*</sup>The eGFR groups were divided into 1, 2, 3 and 4 according to the range was < 30 mL/min/1.73m<sup>2</sup>, 30~59 mL/min/1.73m<sup>2</sup>, 60~89 mL/min/1.73m<sup>2</sup> and ≥90 mL/min/1.73m<sup>2</sup>, respectively.

**Table S3.** The probabilities of inclusion derived from the Bayesian Kernel Machine Regression models.

|                              | MCs    | As     | Cd     |
|------------------------------|--------|--------|--------|
| Conditional-PIP <sup>a</sup> | 0.9991 | 0.8369 | 0.8862 |

<sup>a</sup>This index indicates the posterior probability that a particular exposure was include into the model from the multiple iterations (20000) of the Monte Carlo Markov chain sampler.

**Table S4.** Sensitivity analysis: Conditional logistic regression analysis and trend test by different outcome diagnostics.

|                        | Total population<br>AOR (95% CI) | <i>p</i> value <sup>c</sup> | Group by eGFR <sup>a</sup><br>AOR (95% CI) | <i>p</i> value <sup>c</sup> | Group by<br>albuminuria <sup>b</sup><br>AOR (95% CI) | <i>p</i> value <sup>c</sup> |
|------------------------|----------------------------------|-----------------------------|--------------------------------------------|-----------------------------|------------------------------------------------------|-----------------------------|
| <b>MCs<sup>d</sup></b> |                                  | 0.003                       |                                            | 0.004                       |                                                      | 0.34                        |
| Q1                     | reference                        |                             | reference                                  |                             | reference                                            |                             |
| Q2                     | 3.70 (1.38, 9.93)                |                             | 4.71 (1.36, 16.25)                         |                             | 1.55 (0.72, 3.35)                                    |                             |
| Q3                     | 4.20 (1.62, 10.90)               |                             | 4.96 (1.49, 16.45)                         |                             | 1.78 (0.81, 3.94)                                    |                             |
| Q4                     | 4.81 (1.96, 11.81)               |                             | 6.00 (1.85, 19.48)                         |                             | 1.66 (0.76, 3.62)                                    |                             |
| <b>As<sup>e</sup></b>  |                                  | 0.001                       |                                            | 0.037                       |                                                      | 0.18                        |
| Q1                     | reference                        |                             | reference                                  |                             | reference                                            |                             |
| Q2                     | 0.89 (0.37, 2.11)                |                             | 1.76 (0.74, 4.16)                          |                             | 1.23 (0.55, 2.73)                                    |                             |
| Q3                     | 2.51 (1.06, 5.96)                |                             | 2.04 (0.92, 4.57)                          |                             | 1.46 (0.68, 3.12)                                    |                             |
| Q4                     | 3.40 (1.51, 7.65)                |                             | 2.35 (1.09, 5.07)                          |                             | 1.60 (0.77, 3.34)                                    |                             |

Note: AOR, adjusted odds ratio; CI, confidence interval. The concentrations of MCs/As was divided into the groups of Q1-Q4 according to the quartiles of control group: Q1 (0%-25%), Q2 (25%-50%), Q3 (50%-75%), Q4 (75%-100%). Total population: cases = 135, controls = 135. <sup>a</sup> Case group according to eGFR < 60 mL/min/1.73 m<sup>2</sup>: cases = 85, controls = 85. <sup>b</sup> Case group according to albuminuria: cases = 76, controls = 76. <sup>c</sup> *p* for trend was fitted using the median value of MCs or As in each quartile as a continuous variable. <sup>d</sup> Adjusted for hypertension and As concentration. <sup>e</sup> Adjusted for hypertension and MCs concentration.
